# Supplementary material
Source: PubMed Central journal article supplement (PMC2843213)
Supplement: supp_M109.062588_Supplementary.pdf [file supp_M109.062588_Supplementary.pdf]

## G9A AND GLP METHYLATE LYSINE 373 IN THE TUMOR SUPPRESSOR P53

Jing Huang, Jean Dorsey, Sergei Chuikov, Xinyue Zhang  
Thomas Jenuwein, Danny Reinberg, and Shelley L. Berger

### Supplementary Experimental Procedures

siRNA sequences:

G9a\_siRNA#1: sense, UGAGAGAGGAUGAUUCUUAUU; anti-sense, 5'-  
pUAAGAAUCAUCCUCUCUCAUU

G9a\_siRNA#2: sense, GAACAUCGAUCGCAACAUCUU; anti-sense, 5'-  
pGAUGUUGCGAUCGAUGUUCUU

Glp\_siRNA#1: sense, CAAACAGCGUGGUCAAGUAUU; anti-sense, 5'-  
pUACUUGACCACGCUGUUUGUU

Glp\_siRNA#2: sense, CAAGAAAGGCCACUACGAAUU; anti-sense, 5'-  
pUUCGUAGUGGCCUUUCUUGUU

Realtime PCR primer sequences:

G9a mRNA: forward, 5'-TCATGCTGCACCAAGACCTG-3'; reverse, 5'-  
GGGAACTGAAGAAGGCGATG-3'

Glp mRNA: forward, 5'-TCCAAGGCCAAAGAGGTGAC-3'; reverse, 5'-  
CACGGTCGAGGTGGTGTCT-3'

GAPDH mRNA: forward, 5'-TGGGCTACACTGAGCACCAG-3'; reverse, 5'-  
GGGTGTCGCTGTTGAAGTCA-3'

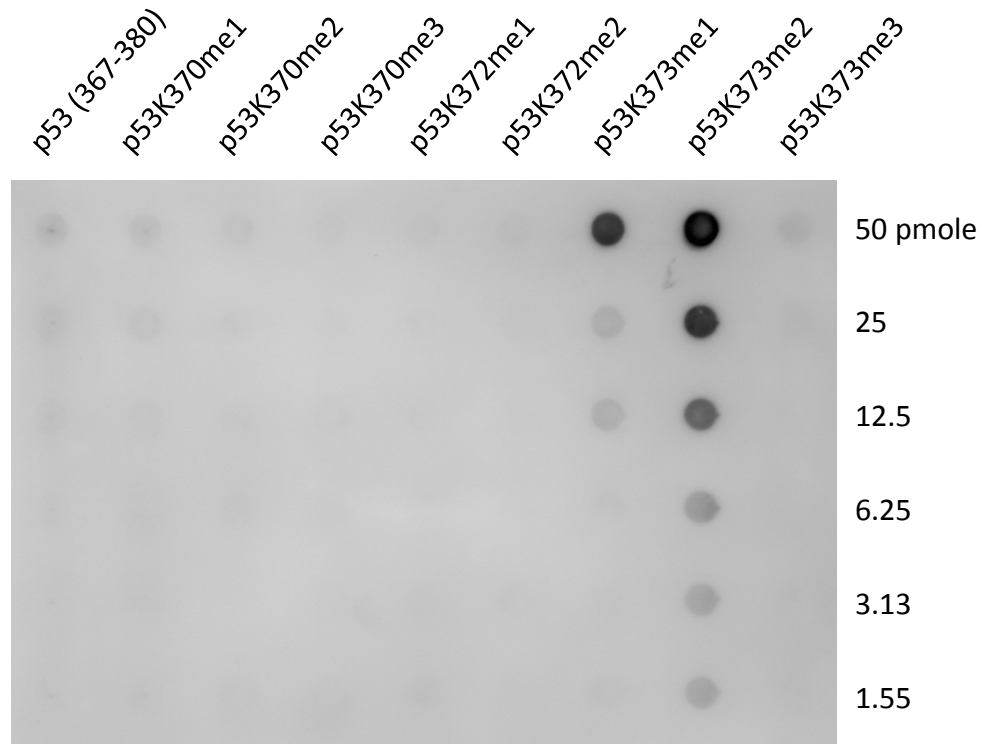

**Figure S1.** Dotblot analysis to characterize the p53K373me2 antibody. Serial dilution of p53 peptides (as indicated) are dotted on the PVDF membrane followed by blotting with 1:1,000 dilution of p53K373me2 antibody.

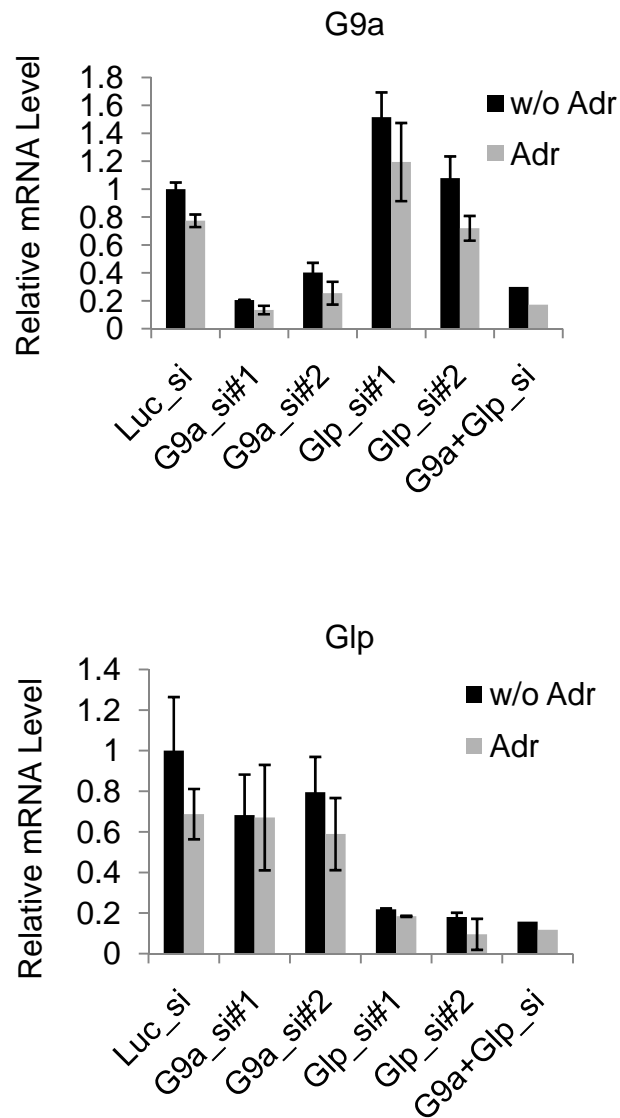

**Figure S2.** Realtime PCR analysis to assess the knockdown efficiency of siRNAs for luciferase (Luc\_si), G9a (G9a\_si#1 or #2), Glp (Glp\_si#1 or #2) and both (G9a+Glp\_si). Shown are normalized values of G9a or Glp mRNA levels to those of GAPDH (internal controls). The normalized value for Luci\_si without adriamycin treatment was set as 1. Shown are the relative mRNA level from the averages of two independent repeats.
